# Supplementary material for: Hypomethylation of ATP1A1 Is Associated with Poor Prognosis and Cancer Progression in Triple-Negative Breast Cancer
Source: MDPI journal article supplement (doi:10.3390/cancers16091666), 2024-04-25
Supplement: s1 [file s1]

## Supplementary Figures

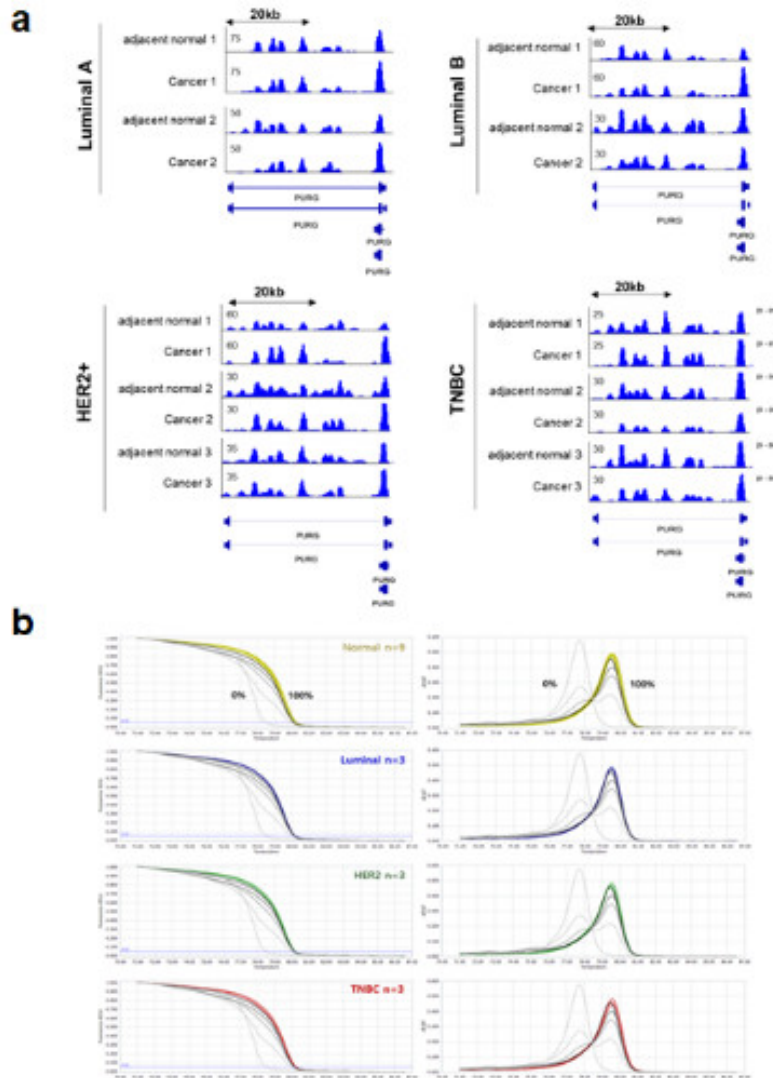

**Supplementary Figure S1. Validation of the imprinting control region (ICR) of the PURG gene using methylation-sensitive high resolution melt (MS-HRM) analysis in different breast cancer subtypes and adjacent non tumor lesions.** (A) Raw sequencing tag profiles of the imprinting control region (ICR) of the PURG locus on chromosome 8. Blue bars indicate that the gene body of the PURG gene had high peak calling in all breast samples. (B) Standard melting curves shown with a grey color gradient: 0%, light grey; 100%, dark grey. PURG melting curves overlapping the 100% control indicated full methylation in breast tumor and NTL samples.

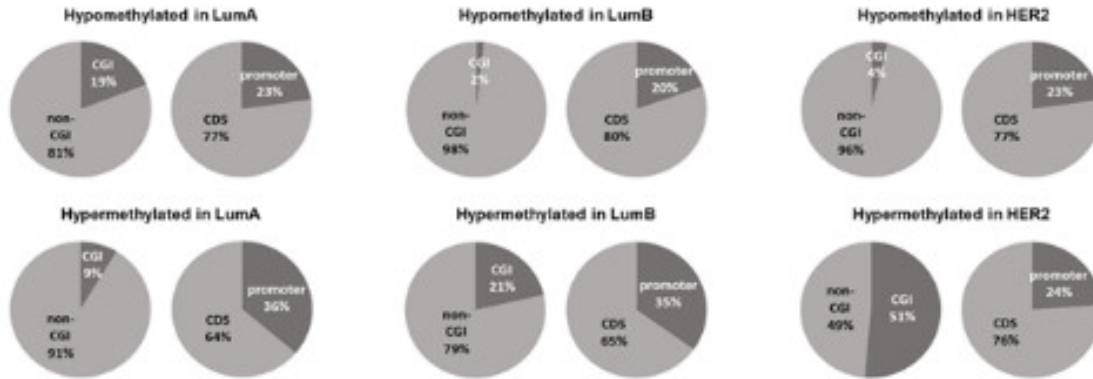

**Supplementary Figure S2. Identification of DMR between breast tumor and non-tumor lesion in luminal A, luminal B, and HER2 subtypes.** Pie charts representing the percentage of hyper- and hypomethylated DMRs that overlapped with the promoter and CDS or CGI and non-CGI.

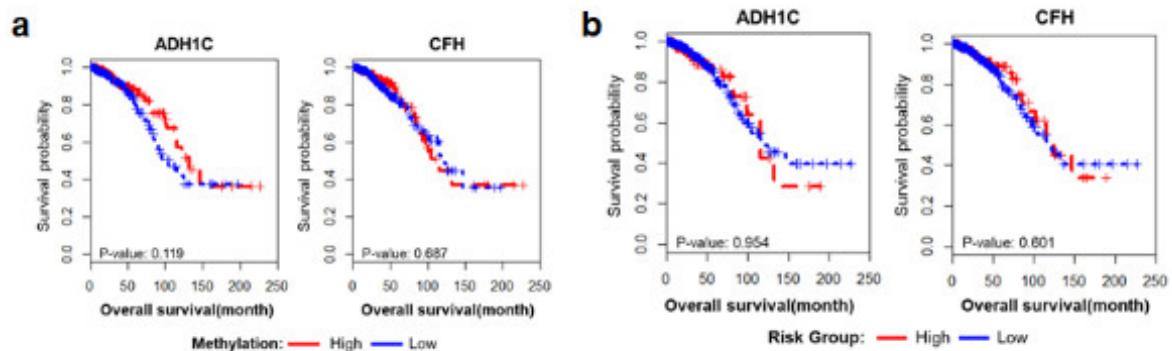

**Supplementary Figure S3. Analysis of overall survival depending on ADH1C and CFH in basal-like breast cancer.** (A) Overall survival analysis following methylation of ADH1C and CFH in basal-like breast cancer. (B) Classified samples to define high risk group of two genes were difference (ADH1C gene was defined by hypermethylated and low expressed samples, and CFH gene was defined by hypomethylated and low expressed samples). The others were classified into low risk group. We then performed a log-rank test to compare the Kaplan-Meier survival curves of these two groups.

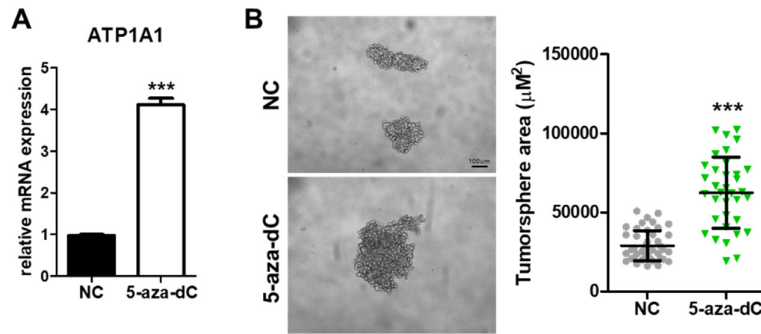

**Supplementary Figure S4. Effect of demethylating agent on tumor sphere formation of MDA-MB-231.** (A) Validation of ATP1A1 mRNA expression under treatment of 5-aza-dC (5uM). (B) Representative images of NC (negative control) or 5-aza-dC treated groups. Graph showing the sphere area of each group. \*\*\*P < 0.001.

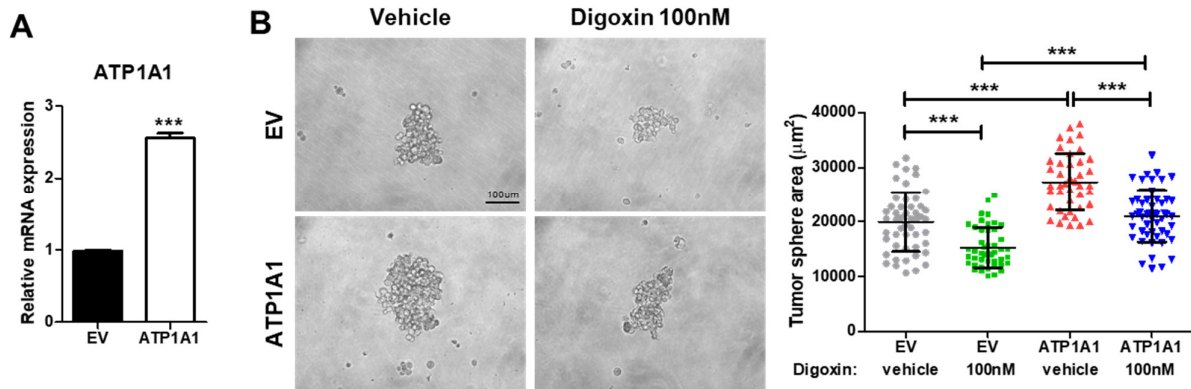

**Supplementary Figure S5. Effect of digoxin treatment on control and ATP1A1 transfected MDA-MB-231 in tumorsphere condition.** (A) Relative ATP1A1 mRNA expression in EV (empty vector) transfected and ATP1A1 transfected MDA-MB-231 cells. (B) Representative images of EV transfected MDA-MB-231, EV transfected MDA-MB-231 with digoxin (100nM), ATP1A1 transfected MDA-MB-231, and ATP1A1 transfected MDA-MB-231 with digoxin (100nM). Graph showing the sphere area of each group. \*\*\*P < 0.001.

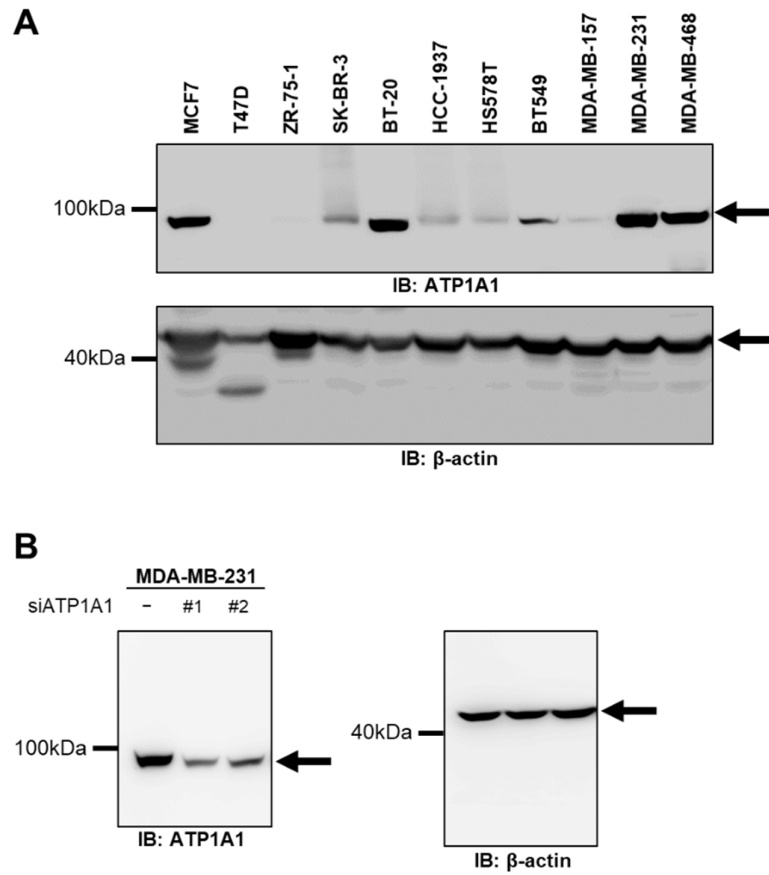

**Supplementary Figure S6. Uncropped blots of western blot.** (A) Uncropped blot of Fig 4D. (B) Uncropped blot of Fig 5A.

## Supplementary Tables

**Supplementary Table 1.** Illumina sequencing read profiles

| Sample  | Total Reads sequenced | Number mapped to reference | Fraction mapped | Number unmapped to reference | Fraction unmapped | Suppressed multiple mapped reads | Fraction suppressed |
|---------|-----------------------|----------------------------|-----------------|------------------------------|-------------------|----------------------------------|---------------------|
| LA N1   | 24,992,664            | 17,451,644                 | 0.70            | 7,422,825                    | 0.30              | 118,195                          | 0.0047              |
| LA C1   | 26,933,967            | 20,031,803                 | 0.74            | 6,788,650                    | 0.25              | 113,514                          | 0.0042              |
| LA N2   | 22,241,489            | 16,575,069                 | 0.75            | 5,566,360                    | 0.25              | 100,060                          | 0.0045              |
| LA C2   | 24,313,692            | 17,595,734                 | 0.72            | 6,617,243                    | 0.27              | 100,715                          | 0.0041              |
| LB N1   | 23,558,274            | 16,840,589                 | 0.71            | 6,604,323                    | 0.28              | 113,362                          | 0.0048              |
| LB C1   | 27,785,194            | 20,571,821                 | 0.74            | 7,092,067                    | 0.26              | 121,306                          | 0.0044              |
| LB N2   | 22,758,527            | 16,354,071                 | 0.72            | 6,297,230                    | 0.28              | 107,226                          | 0.0047              |
| LB C2   | 26,768,727            | 20,375,463                 | 0.76            | 6,275,854                    | 0.23              | 117,410                          | 0.0044              |
| HER2 N1 | 23,320,197            | 17,910,666                 | 0.77            | 5,292,131                    | 0.23              | 117,400                          | 0.0050              |
| HER2 C1 | 27,008,427            | 20,678,354                 | 0.77            | 6,214,077                    | 0.23              | 115,996                          | 0.0043              |
| HER2 N2 | 23,705,925            | 17,495,182                 | 0.74            | 6,106,396                    | 0.26              | 104,347                          | 0.0044              |
| HER2 C2 | 25,122,381            | 18,468,415                 | 0.73            | 6,529,342                    | 0.26              | 124,624                          | 0.0050              |
| HER2 N3 | 25,373,228            | 19,077,588                 | 0.75            | 6,169,484                    | 0.24              | 126,156                          | 0.0050              |
| HER2 C3 | 28,530,260            | 20,942,751                 | 0.73            | 7,434,615                    | 0.26              | 152,894                          | 0.0054              |
| TNBC N1 | 22,662,185            | 16,056,015                 | 0.71            | 6,500,202                    | 0.29              | 105,968                          | 0.0047              |
| TNBC C1 | 20,850,030            | 15,646,398                 | 0.75            | 5,107,992                    | 0.25              | 95,640                           | 0.0046              |
| TNBC N2 | 25,374,368            | 18,542,243                 | 0.73            | 6,703,264                    | 0.26              | 128,861                          | 0.0051              |
| TNBC C2 | 25,810,759            | 19,898,938                 | 0.77            | 5,803,224                    | 0.22              | 108,597                          | 0.0042              |
| TNBC N3 | 22,986,322            | 17,206,623                 | 0.75            | 5,670,840                    | 0.25              | 108,859                          | 0.0047              |
| TNBC C3 | 23,093,237            | 17,459,322                 | 0.76            | 5,535,582                    | 0.24              | 98,333                           | 0.0043              |

**Supplementary Table 2.** Specific primers for PCR amplification of MS-HRM

| Primer      | Sense                      | Antisense                 |
|-------------|----------------------------|---------------------------|
| PURG MCA    | TGTAGTTGAAGATGGAAAGAGTTAGG | ATAAAATCCCCTAAACAATCCTTCA |
| ATP1A1 MCA1 | TGTGATGGGAAGAATTGTTATATTT  | TTTCTCCACTACACTATTCAAAACC |
